# Supplementary material
Source: Elsevier journal article supplement (https://www.sciencedirect.com/science/article/pii/S1134282X16300720)
Supplement: mmc1 [file S1134282X16300720:mmc1.doc]

**Intervista per le seconde vittime**

| **I parte: dati demografici (può essere fatta prima dell’avvio dell’intervista vera e propria).** |
| --- |
| 1. Genere (M/F) |
| 1. Professione svolta |
| 1. Anni di esperienza lavorativa |
| **II parte: dettagli dell’evento** |
| 1. Parliamo dell’evento clinico che ha avuto un impatto su di lei sia a livello professionale sia a livello personale. Le va di condividere e ricordare l’evento, in modo più specifico possibile, dal momento in cui si è accorto che qualcosa non andava? Come ha reagito all’evento? Che impatto ha avuto su di lei?   Se il racconto non è dettagliato si può procedere facendo le domande che seguono |
| 1. Quanto tempo fa si è verificato l’evento? |
| 1. Che tipo di evento era? (Errore medico/infermieristico o esito inatteso) |
| 1. Mi descrive il suo ruolo nell’evento? |
| 1. Cosa ne è derivato per il paziente? (Nulla di male, male temporaneo, danno permanente, morte) |
| 1. L’evento si è verificato nella struttura dove lavora ora o altrove? |
| **III parte: Impatto professionale e personale di questa esperienza** |
| 1. Grazie per aver condiviso i dettagli dell'evento con me. Ora vorrei mettere a fuoco ciò che ha provato, sia a livello professionale sia a livello personale, subito dopo aver vissuto l’evento. |
| 1. Quali esigenze/bisogni sentiva di avere? |
| 1. Come sono stati affrontati questi bisogni? |
| 1. Ha avuto dei bisogni che non sono stati affrontati? |
| 1. Cosa consiglierebbe di fare per affrontare questi bisogni? |
| **IV parte: esperienza del partecipante, normali reazioni allo stress** |
| 1. Quando è stressato per qualcosa che accade sul posto di lavoro, come fa di solito a gestire la situazione? |
| 1. A chi si rivolge di solito quando ha bisogno di consigli, rassicurazione o di sostegno per un problema correlato al lavoro? |
| 1. Nella sua formazione professionale, come ha imparato a rispondere agli eventi avversi dei pazienti su base professionale e/o personale? |
| 1. Quale crede sia il posto migliore, per un approccio tra docenti e personale, per capire come gestire gli eventi avversi? (Università/ luogo di lavoro/altro) |
| **V parte: strutture di supporto** |
| 1. Sulla base della sua esperienza, che cosa farebbe di diverso per sostenere un collega che sta attraversando lo stesso percorso/periodo che ha attraversato lei? |
| 1. All’interno della sua struttura lavorativa come descriverebbe, in termini di supporto o non supporto, l’ambiente che si crea dopo un evento che ha un impatto emotivo su un membro del team? |
| 1. Noi vorremmo progettare un sistema di supporto/orientamento per i professionisti che hanno attraversato dei momenti difficili dopo un evento avverso. Ha dei consigli per noi? |
| 1. C’è qualcos’altro che vuol condividere della sua esperienza? |
| 1. La prego di leggere questo elenco di sintomi che i professionisti riferiscono di manifestare dopo aver vissuto/causato un evento avverso (allegato 1-intervista). Ha avuto qualcuno di questi sintomi? Che impatto ha avuto il sintomo sulla sua vita professionale e personale? Quando sono comparsi e per quanto tempo ha avuto questi sintomi? |
| 1. Ci sono dei sintomi, che non sono riportati in questa lista, che pensa debbano essere inclusi? |
| 1. Ci sono dei commenti aggiuntivi che desidera fare per quanto riguarda la sua esperienza? |

**Allegato 1-Intervista, sintomi fisici e psico-sociali**

| **Sintomi fisici** | **Si** | **No** | **Durata** | **Sintomi psico-sociali** | **Si** | **No** | **Durata** |
| --- | --- | --- | --- | --- | --- | --- | --- |
| **Aumento della frequenza respiratoria** |  |  |  | **Afflizione/dispiacere** |  |  |  |
| **Aumento della pressione arteriosa** |  |  |  | **Ansia al ritorno a lavoro** |  |  |  |
| **Disturbi del sonno** |  |  |  | **Depressione** |  |  |  |
| **Estrema stanchezza** |  |  |  | **Difficoltà di concentrazione** |  |  |  |
| **Tachicardia** |  |  |  | **Diminuzione della soddisfazione sul lavoro** |  |  |  |
| **Tensione muscolare** |  |  |  | **Dubbi** |  |  |  |
|  |  |  |  | **Eccessiva eccitabilità** |  |  |  |
|  |  |  |  | **Estrema tristezza** |  |  |  |
|  |  |  |  | **Evitare la zona di cura del paziente** |  |  |  |
|  |  |  |  | **Flashback** |  |  |  |
|  |  |  |  | **Frustrazione** |  |  |  |
|  |  |  |  | **Paura di danneggiare la propria reputazione** |  |  |  |
|  |  |  |  | **Pensiero di una seconda carriera** |  |  |  |
|  |  |  |  | **Perdita di fiducia** |  |  |  |
|  |  |  |  | **Rabbia** |  |  |  |
|  |  |  |  | **Ricordi ripetitivi / intrusivi** |  |  |  |
|  |  |  |  | **Rimorso** |  |  |  |
